# Supplementary material
Source: Springer Nature journal article supplement (https://www.springermedizin.de/resource/supplementary/12876_2008_248_MOESM2_ESM.pdf/9439008)

### Postprandial Esophageal Acidity

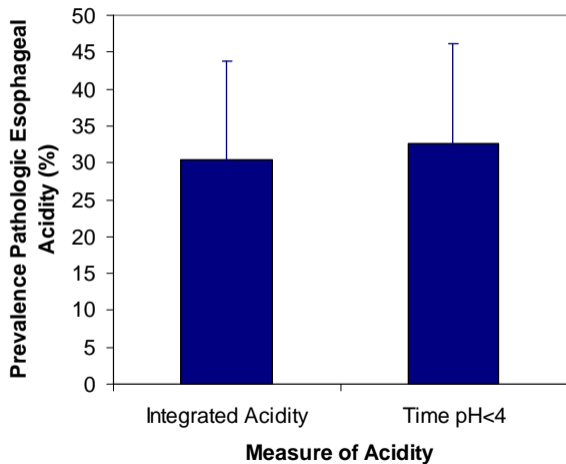

### Postprandial Esophageal Acidity Records with Normal Integrated Acidity and Pathologic Time pH<4

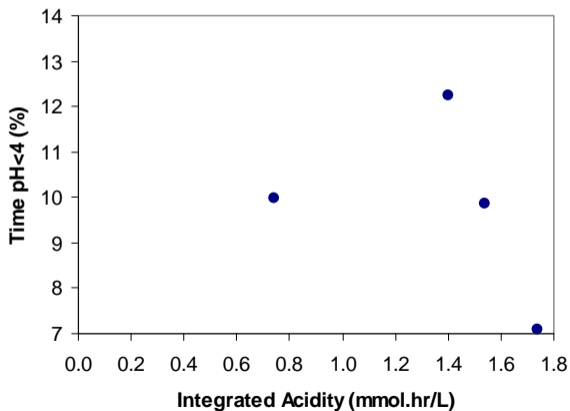

Supplement: MOESM2 [file 9439008]
